# Supplementary material
Source: PubMed Central journal article supplement (PMC4254854)

## Supporting Information

**F6 Binding to the Complexes Formed with L-Trp.** The  $(\text{Na}^+)\text{E}(\text{Ain})$  complex gives a mixture of covalent intermediates when reacted with L-Trp. This mixture is dominated by the external aldimine and quinonoid species,  $(\text{Na}^+)\text{E}(\text{Aex}_2)$  and  $(\text{Na}^+)\text{E}(\text{Q}_3)$ .<sup>1-5</sup> Tryptophan synthase cleavage of L-Trp to give indole and the  $(\text{Na}^+)\text{E}(\text{A-A})$  is an extremely slow process and is insignificant on the time scale of these experiments.<sup>6</sup> Titration of the F6 complex of  $(\text{Na}^+)\text{E}(\text{Ain})$  with L-Trp (Figure S1a) shows that at low L-Trp concentrations, the spectrum consists of peaks for free ( $-57.00 \pm 0.01$  ppm) and bound F6 ( $-56.52 \pm 0.01$  ppm). As the concentration of L-Trp increases, the  $-56.52 \pm 0.01$  ppm peak decreases in area and a new bound peak with chemical shift  $-55.45 \pm 0.01$  ppm appears. The area of this peak increases and then saturates at high L-Trp concentrations. The UV/Vis absorption spectrum of an NMR sample measured at the highest L-Trp concentration (Figure S1b), shows the sample is comprised of  $(\text{F6})(\text{Na}^+)\text{E}(\text{Aex}_2)$  with  $\lambda_{\text{max}} = 418$  nm, together with a trace of  $(\text{F6})(\text{Na}^+)\text{E}(\text{Q})_{\text{L-Trp}}$  ( $\lambda_{\text{max}} = 418$  nm and 476 nm, respectively).<sup>2,4,5,7-9</sup>

**Monovalent Cation Effects on the Reaction of L-His with the  $(\text{F6})\text{E}(\text{Ain})$  Complex.** The substitution of  $\text{Cs}^+$  for  $\text{Na}^+$  in all of the systems under investigation herein, alters the redistribution of  $\beta$ -site chemical intermediates and the distribution of open and closed conformational states. Thus the distribution of chemical species (i.e., external aldimine vs.  $\alpha$ -aminoacrylate vs. quinonoid species) is changed, but the chemical shifts observed for the bound forms of F6 and F9 are unchanged. For example, the observed chemical shift of  $(\text{F6})(\text{Na}^+)\text{E}(\text{Ain})$  is identical to that of  $(\text{F6})(\text{Cs}^+)\text{E}(\text{Ain})$ , and the chemical shifts of F6 bound to  $\text{E}(\text{A-A})$  species and to  $\text{E}(\text{Q})$  species are unperturbed by substitution of  $\text{Na}^+$  by  $\text{Cs}^+$ .

The L-Trp analogue, L-His, reacts with the  $\text{Na}^+$  and  $\text{Cs}^+$  forms of the (F6)E(Ain) complex to give equilibrating mixtures dominated by the external aldimine and quinonoid complexes.<sup>5</sup> The distribution of external aldimine and quinonoid species at equilibrium is dependent on the particular monovalent cation bound to the MVC site of the  $\beta$ -subunit.<sup>3,10-15</sup> The  $^{19}\text{F}$  NMR spectra presented in Figure S2a establish that the distribution of bound intermediates is sensitive to the particular MVC, with  $\text{Cs}^+$  favoring the complex with chemical shift  $-55.45 \pm 0.01$  ppm, whereas,  $\text{Na}^+$  gives bound species with chemical shifts of  $-55.45 \pm 0.01$  ppm and  $-56.57 \pm 0.01$  ppm. The UV/Vis absorbance spectra presented in Figure S2b show that the  $\text{Cs}^+$  complex (a) favors the (F6)( $\text{Cs}^+$ )E(Q)<sub>L-His</sub> species ( $\lambda_{\text{max}} = 466$  nm), while the  $\text{Na}^+$  complex gives a mixture of species with  $\lambda_{\text{max}} = 466$  nm, corresponding to the quinonoid species, and a broad envelope with  $\lambda_{\text{max}} \sim 423$  nm corresponding to the (F6)( $\text{Cs}^+$ )E(Aex)<sub>L-His</sub> species. The UV/Vis spectra in Figure S2c show the spectral changes resulting from the titration of the (F6)( $\text{Na}^+$ )E(Ain) complex with L-His. These spectra establish that the spectrum of the internal aldimine ( $\lambda_{\text{max}} = 412$  nm) disappears as L-His reacts to form the (F6)( $\text{Cs}^+$ )E(Aex)<sub>L-His</sub> and (F6)( $\text{Cs}^+$ )E(Q)<sub>L-His</sub> species (Figure S2c). The plot of  $\Delta\text{Abs}_{466\text{nm}}$  vs. [L-His] taken from the data in Figure S2c is shown in Figure S2d.

## Supplemental References

(1) Dunn, M. F., Aguilar, V., Brzovic, P., Drewe, Jr., W. F., Houben, K.F., Leja, C.A. & Roy, M. (1990). The tryptophan synthase bienzyme complex transfers indole between the  $\alpha$ - and  $\beta$ -sites via a 25-30 Å long tunnel. *Biochemistry* 29, 8598-8607.

- (2) Drewe Jr, W. F. & Dunn, M. F. (1986). Characterization of the reaction of L-serine and indole with *Escherichia coli* tryptophan synthase via rapid-scanning ultraviolet-visible spectroscopy. *Biochemistry* 25, 2494-2501.
- (3) Woehl, E. U. & Dunn, M. F. (1999b). Mechanisms of monovalent cation action in enzyme catalysis: the tryptophan synthase  $\alpha$ -,  $\beta$ -, and  $\alpha\beta$ -reactions. *Biochemistry* 38, 7131-7141.
- (4) K. Kirschner, W.O. Weischet, R.L. Wiskocil, Ligand binding to enzyme complexes, in: H. Sund, H.G. Blaver (Eds.) *Protein-Ligand Interactions*, Walter de Gruyter, Berlin (1975) pp. 27-44.
- (5) Houben, K. F., Kadima, W., Roy, M. & M.F. Dunn, M. F. (1989). L-serine analogues form Schiff base and quinonoidal intermediates with *Escherichia coli* tryptophan synthase. *Biochemistry* 28, 4140-4147.
- (6) Miles, E. W.; Phillips, R. S.; Yeh, H. J. C.; Cohen, L. A. (1986). Isomerization of (3S)-2,3-dihydro-5-fluoro-L-tryptophan and of 5-fluoro-L-tryptophan catalyzed by tryptophan synthase: studies using fluorine-19 nuclear magnetic resonance and difference spectroscopy *Biochemistry* 25, 4240-4249.
- (7) Ngo, H., Harris, R., Kimmich, N., Casino, P., Niks, D., Blumenstein, L., Barends, T. R., Kulik, V., Weyand, M., Schlichting, I. & Dunn, M. F. (2007). Synthesis and characterization of allosteric probes of substrate channeling in the tryptophan synthase bienzyme complex. *Biochemistry* 46, 7713-7727.
- (8) Ngo, H., Kimmich, N., Harris, R., Niks, D., Blumenstein, L., Kulik, V., Barends, T. R., Schlichting, I. & Dunn, M. F. (2007b) Allosteric regulation of substrate channeling in tryptophan

synthase: Modulation of the L-serine reaction in stage I of the  $\beta$ -reaction by  $\alpha$ -site ligands.

**Biochemistry** 46, 7740-7753.

(9) Houben, K.F. & Dunn, M. F. (1990). Allosteric effects acting over a distance of 20-25 Å in the Escherichia coli tryptophan synthase bienzyme complex increase ligand affinity and cause redistribution of covalent intermediates. *Biochemistry* 29, 2421-2429.

(10) Peracchi, A., Mozzarelli, A. & Rossi, G. L. (1995). Monovalent cations affect dynamic and functional properties of the tryptophan synthase  $\alpha_2\beta_2$  complex. *Biochemistry* 34, 9459-9465.

(11) Woehl, E. U. & Dunn, M. F. (1995a). Monovalent metal ions play an essential role in catalysis and intersubunit communication in the tryptophan synthase bienzyme complex. *Biochemistry* 34, 9466-9476.

(12) Woehl, E. U. & Dunn, M. F. (1995b). The roles of  $\text{Na}^+$  and  $\text{K}^+$  in pyridoxal phosphate enzyme catalysis. *Coord. Chem. Rev.* 144, 147-197.

(13) Woehl, E. U. & Dunn, M. F. (1999a). Mechanisms of monovalent cation action in enzyme catalysis: the first stage of the tryptophan synthase  $\beta$ -reaction. *Biochemistry* 38, 7118-7130.

(14) Weber-Ban, E., Hur, O., Bagwell, C., Banik, U., Yang, L.-H., Miles, E. W., & M.F. Dunn (2001) Investigation of allosteric linkages in the regulation of tryptophan synthase: The roles of salt bridges and monovalent cations probed by site-directed mutation, optical spectroscopy, and kinetics. *Biochemistry* 40, 3497-3511.

(15) Dierkers, A. T., Niks, D., Schlichting, I. & Dunn, M. F. (2009). Trptophan synthase: structure and function of the monovalent cation site. *Biochemistry* 48, 10997–11010.

#### **Figure Captions: Supporting Information**

**Figure S1a:** Titration of the (F6)(Na<sup>+</sup>)E(Ain) complex with L-Trp. Concentrations:  $\alpha\beta$ , 0.800 mM; L-Trp (increasing from bottom to top): 0.00, 53  $\mu$ M, 122  $\mu$ M, 254  $\mu$ M, 382  $\mu$ M, 793  $\mu$ M, 1.25 mM, 2.03 mM. **Figure S1b:** UV/Vis absorption spectra of the NMR samples in Figure S1a corresponding to the (F6)(Na<sup>+</sup>)E(Ain) complex (black) and of the species formed when a saturating concentration of L-Trp is reacted with the (Na<sup>+</sup>)E(Ain) complex (red).

**Figure S2a:** Comparison of the effects of 20 mM Na<sup>+</sup> (red) and 200 mM Cs<sup>+</sup> (black) on the <sup>19</sup>F NMR spectra resulting from reaction of 100 mM L-His with (F6)E(Ain). [ $\alpha\beta$ ] = 1.40 mM; [F6] = 2.8 mM. **Figure S2b:** UV/Vis absorbance spectra for NMR samples presented in 7a. Na<sup>+</sup> complex, red, Cs<sup>+</sup> complex, black. **Figure S2c:** The UV/Vis spectra for the titration of the (F6)(Na<sup>+</sup>)E(Ain) complex with L-His. [ $\alpha\beta$ ] = 10mM; [F6] = 2.8 mM; [ $\alpha\beta$ ] = XX; [Na<sup>+</sup>] = 100 mM; L-His concentrations: 1.59 mM, 3.92 mM, 11.32 mM, 21.42 mM, 43.75 mM, 100.00 mM. **Figure S2d:** Plot of  $\Delta\text{Abs}_{466\text{nm}}$  vs. [L-His]. Data taken from Figure S2c.

**Figure S1**

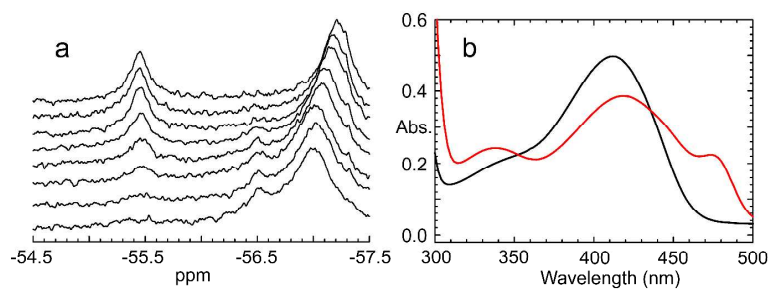

**Figure S2**

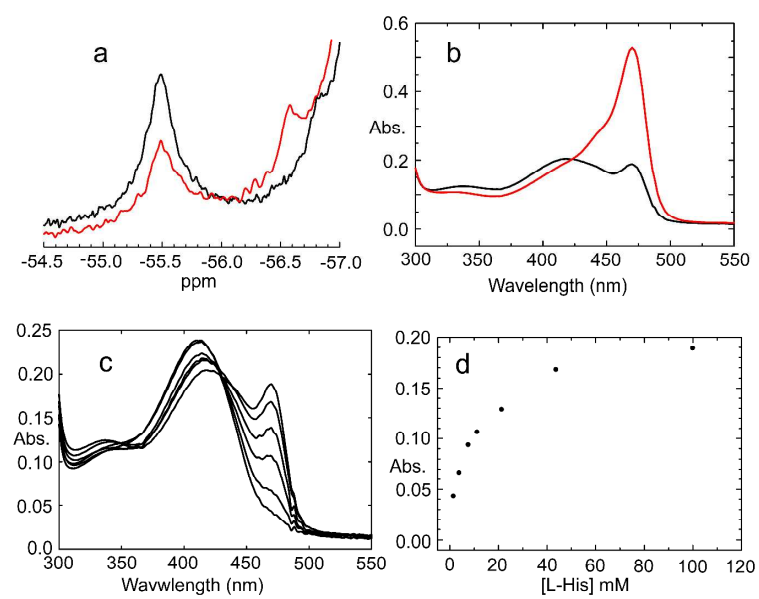

Supplement: NIHMS644387-supplement-Supplementary_Data.pdf [file NIHMS644387-supplement-Supplementary_Data.pdf]
